# Supplementary material for: Meta-analysis of genome-wide DNA methylation identifies shared associations across neurodegenerative disorders
Source: Genome Biol. 2021 Mar 26;22:90. doi: 10.1186/s13059-021-02275-5 (PMC8004462; doi:10.1186/s13059-021-02275-5)
Supplement: Supplementary file 2 — Additional file 2. Supplementary tables. [file 13059_2021_2275_MOESM2_ESM.xlsx]

## Sheet: Legend
Table S1 - Number of DNA methylation probes and individuals passing quality control used in the MWAS analyses for each cohort, and meta-analyses.
Table S2 - Descriptive statsitics of covariates analyzed in this study, stratified by case-control status and cohort. Covariates include sex, predicted age, predicted smoking scores.
Table S3 - Summary statistics of the 12 genome-wide significantly associated probes for the meta-analysis of all neurodgenerative disorders (AD + ALS + PD), and respective summary statistics in a meta-analysis of the ALS cohorts and meta-analysis of the PD cohorts.
Table S4 - Top-most associated mQTL SNPs for the top-most significantly associated MOMENT meta-analysis of AD, ALS and PD, DNAm sites and their corresponding p-values in a meta-analysis of of GWAS summary statistics of AD, ALS and PD. Blood and brain mQTL SNPs were associated with 3 and of the 13 DNAm probes, respectively. None of the mQTLs overlapped with significant SNPs from the meta-analysis …
Table S5 - Top eQTLs per gene, passing Bonferroni corection (from AMP-AD consortium), falling in the queried 1Mb window, centered at each of the 12 DMPs from MOMENT meta-analysis. Base pair annotation from hg19 build.
Table S6 - Results of logistic regression models used to estimate effect sizes of cell-type proportion for each cohort.
Table S7 - Characteristic scores (-log10 of Leven's test p-value) reflecting variation in each cell type, for each CpG.

## Sheet: Table S1
Table S1 - Number of DNA methylation probes and individuals passing quality control used in the MWAS analyses for each cohort, and meta-analyses.
	AUS	Netherlands	KCL	SGPD	PEG	AIBL	ADNI	AddNeuroMed	SCZ1	SCZ2	RA	Meta-analysis ALS	Meta-analysis PD	Meta-analysis SCZ	Meta-analysis AD, ALS and PD
Individuals passing QC	1395	1811	1348	1638	493	632	235	173	757	727	685	4554	2131	1484	7317
All probes passing QC	485139	485095	484973
Autosomal probes passing QC, not cross-hybridizing and without SNP overlap, with standard deviation > 0.02	208434	254118	206473	253771	219712	373711	-	-	224487	179682	234936	194318	210705	177420	151506
AUS - Australian amyotrophic lateral sclerosis cohort
Netherlands - Netherlands amyotrophic lateral sclerosis cohort
KCL - King's College London amyotrophic lateral sclerosis cohort
SGPD - Systems Genomics of Parkinson's Disease cohort
PEG - Parkinson’s disease, Environment, and Genes (PEG) cohort
SCZ - Schizophrenia cohort (UK)
RA - Rheumatoid arthritis cohort

## Sheet: Table S2
Table S2 - Descriptive statsitics of covariates analyzed in this study distributed by cohort. Covariates include case-control status, sex, predicted age, predicted smoking scores,
	AIBL				ADNI				AddNeuroMed				AUS				KCL				NL				SGPD				PEG				SCZ1				SCZ2				RA
	Control	Case	Statistic	P-value	Control	Case	Statistic	P-value	Control	Case	Statistic	P-value	Control	Case	Statistic	P-value	Control	Case	Statistic	P-value	Control	Case	Statistic	P-value	Control	Case	Statistic	P-value	Control	Case	Statistic	P-value	Control	Case	Statistic	P-value	Control	Case	Statistic	P-value	Control	Case	Statistic	P-value
	(n=471)	(n=161)			(n=202)	(n=33)			(n=89)	(n=84)			(n=613)	(n=782)			(n=270)	(n=1078)			(n=639)	(n=1172)			(n=787)	(n=851)			(n=212)	(n=281)			(n=322)	(n=349)			(n=405)	(n=408)			(n=333)	(n=352)
Predicted Age
Mean (SD)	69.7 (5.92)	74.2 (7.07)	U = 23,083	1.21e-13	74.8 (6.27)	72.0 (8.26)	U = 3,933	0.0978	70.6 (5.94)	73.7 (6.20)	U = 2,679	0.0013	56.1 (10.8)	56.4 (11.2)	U = 233,015	0.372	63.2 (9.75)	62.9 (10.3)	U = 147,245	0.764	62.4 (8.88)	64.3 (9.47)	U = 325,922	5.03e-06	68.5 (8.49)	69.5 (8.67)	U = 311,537	0.0147	71.8 (12.2)	74.6 (10.0)	U = 26,327	0.0272	41.5 (14.2)	47.1 (14.4)	U = 42,430	4.15e-08	47.8 (11.9)	48.0 (13.5)	U = 83,609	0.768	54.1 (11.4)	52.4 (12.0)	U = 63,103	0.0825
Median [Min, Max]	69.1 [56.7, 85.4]	75.3 [58.2, 90.5]			75.0 [59.5, 103]	73.0 [51.1, 86.6]			71.1 [54.6, 83.0]	74.1 [58.6, 91.5]			57.1 [13.1, 93.7]	58.0 [13.6, 85.9]			63.9 [33.3, 85.8]	63.6 [26.1, 89.1]			63.0 [24.8, 88.9]	65.0 [29.0, 91.8]			68.9 [25.2, 92.0]	70.2 [35.4, 91.7]			74.8 [38.4, 96.1]	76.6 [40.4, 94.7]			36.9 [19.4, 83.9]	45.6 [17.9, 92.1]			49.7 [18.8, 70.6]	47.8 [19.5, 85.6]			55.7 [20.9, 72.0]	54.7 [19.3, 71.0]
Smoking score
Mean (SD)	3.58 (0.514)	3.61 (0.502)	U = 36,036	0.348	3.21 (0.557)	3.18 (0.583)	U = 3,509	0.628	3.34 (0.615)	3.31 (0.529)	U = 3,673	0.845	3.58 (0.769)	3.55 (0.776)	U = 248,349	0.246	3.81 (1.04)	3.72 (0.956)	150142	0.42	3.66 (0.949)	3.79 (1.07)	U = 357069	0.102	3.43 (0.657)	3.25 (0.510)	U = 392404	1.79e-09	3.49 (0.847)	3.36 (0.758)	U = 32,754	0.0581	3.82 (0.896)	5.23 (1.10)	U = 19,656	4.48e-48	3.96 (1.14)	5.09 (1.34)	U = 43,489	1.47e-31	3.92 (1.01)	4.04 (1.13)	U = 56,985	0.531
Median [Min, Max]	3.45 [2.70, 6.27]	3.49 [2.75, 5.26]			3.11 [2.42, 5.97]	3.02 [2.45, 5.19]			3.15 [1.68, 5.89]	3.20 [2.51, 5.66]			3.32 [2.41, 6.54]	3.31 [2.25, 6.79]			3.37 [2.48, 6.84]	3.35 [2.13, 7.45]			3.31 [2.36, 7.76]	3.37 [1.97, 7.64]			3.27 [2.36, 6.37]	3.13 [2.26, 5.73]			3.24 [2.27, 6.73]	3.14 [1.68, 6.48]			3.50 [2.61, 6.72]	5.49 [2.74, 7.26]			3.40 [2.62, 7.37]	5.33 [2.59, 7.74]			3.50 [2.63, 6.98]	3.72 [2.25, 7.03]
Sex
F	272 (57.7%)	91 (56.5%)	Chi = 0.0323	0.857	104 (51.5%)	13 (39.4%)	Chi = 1.21	0.271	54 (60.7%)	58 (69.0%)	Chi = 0.986	0.321	333 (54.3%)	304 (38.9%)	Chi = 32.4	1.23e-08	175 (64.8%)	419 (38.9%)	Chi = 57.9	2.72e-14	272 (42.6%)	500 (42.7%)	Chi = 0	1	401 (51.0%)	312 (36.7%)	Chi = 33.4	7.55e-09	101 (47.6%)	119 (42.3%)	Chi = 1.16	0.281	180 (55.9%)	98 (28.1%)	Chi = 52.3	4.82e-13	102 (25.2%)	128 (31.4%)	Chi = 3.54	0.06	238 (71.5%)	252 (71.6%)	Chi 4.15E-30	1
M	199 (42.3%)	70 (43.5%)			98 (48.5%)	20 (60.6%)			35 (39.3%)	26 (31.0%)			280 (45.7%)	478 (61.1%)			95 (35.2%)	659 (61.1%)			367 (57.4%)	672 (57.3%)			386 (49.0%)	539 (63.3%)			111 (52.4%)	162 (57.7%)			142 (44.1%)	251 (71.9%)			303 (74.8%)	280 (68.6%)			95 (28.5%)	100 (28.4%)

## Sheet: Table S3
Table S3 - Summary statistics of the 12 genome-wide significantly associated probes for the meta-analysis of all neurodgenerative disorders (AD + ALS + PD), and respective summary statistics in a meta-analysis of the ALS cohorts and meta-analysis of the PD cohorts.
Chr	Probe	BP	Gene	Orien	b.META.NDs	se.META.NDs	p.META.NDs	b.META.ALS	se.META.ALS	p.META.ALS	b.META.PD	se.META.PD	p.META.PD	b.AD	se.AD	p.AD
6	cg03546163	35686586	FKBP5	R	-0.4285	0.0616	3.423e-12	-0.3154	0.0747	2.395e-05	-0.6633	0.1229	6.831e-08	-0.702909	0.234109	0.00267779
15	cg26272088	98900110	IGF1R	F	1.3873	0.2015	5.743e-12	1.4501	0.2588	2.112e-08	1.2187	0.3699	0.0009853	1.50052	0.64233	0.019488
2	cg24166814	55840142	-	F	-0.8311	0.1268	5.604e-11	-0.7033	0.1544	5.199e-06	-1.0981	0.2619	2.759e-05	-1.09662	0.420823	0.00916344
22	cg04431254	46288875	TTC38	F	-1.4377	0.2509	1e-08	-1.3052	0.3312	8.134e-05	-1.8441	0.441	2.895e-05	-0.925801	0.77823	0.234194
4	cg06690548	138241654	SLC7A11	R	0.5228	0.0921	1.361e-08	0.3081	0.1126	0.006218	1.0337	0.1841	1.954e-08	0.741894	0.322742	0.0215207
8	cg14195992	47353350	SPIDR	R	-0.8524	0.1505	1.477e-08	-0.7014	0.1772	7.573e-05	-1.212	0.3257	0.0001985	-1.36042	0.587014	0.0204751
4	cg17786255	107893233	RP11-286E11.1;SGMS2	R	-0.6209	0.1125	3.445e-08	-0.5497	0.1355	4.998e-05	-0.644	0.2327	0.005653	-1.209	0.407522	0.00301013
12	cg11881599	92420308	RP11-693J15.4;CLLU1OS;CLLU1	R	0.8486	0.154	3.57e-08	0.7243	0.1901	0.0001391	1.1432	0.2949	0.000106	0.888946	0.574969	0.122086
9	cg13953978	129838509	USP20	F	0.9935	0.1826	5.281e-08	1.0034	0.2359	2.099e-05	0.9587	0.3382	0.004589	1.02481	0.549198	0.0620386
1	cg17901584	54888033	RP11-67L3.4;DHCR24	F	0.4819	0.0915	1.389e-07	0.6381	0.1161	3.94e-08	0.3977	0.165	0.01591	-0.500074	0.339472	0.140726
6	cg18120259	43926902	-	F	0.6689	0.1293	2.294e-07	0.5917	0.1615	0.0002476	0.8651	0.238	0.0002785	0.550474	0.508922	0.27941
10	cg26033520	72244313	-	F	-0.5827	0.1134	2.743e-07	-0.384	0.1456	0.008361	-1.4835	0.2335	2.111e-10	-0.0276059	0.284187	0.922616
AD - Alzheimer's disease
ALS - amyotrophic lateral sclerosis
PD - Parkinson's disease
b.META.NDs - effect sizes of meta-analysis of all neurodegenerative disorders (AD + ALS + PD)
p.META.NDs - p-value of meta-analysis of all neurodegenerative disorders (AD + ALS + PD)
se.META.NDs - standard errors of meta-analysis of all neurodegenerative disorders (AD + ALS + PD)
b.META.ALS - effect sizes of meta-analysis of all ALS cohorts
p.META.ALS - p-value of meta-analysis of all ALS cohorts
se.META.ALS - standard errors of meta-analysis of all ALS cohorts
b.META.PD - effect sizes of meta-analysis of all PD cohorts
p.META.ALS - p-values of meta-analysis of all PD cohorts
se.META.ALS - standard errors of meta-analysis of all PD cohorts
Note: Highlighted in yellow are the significant p-values in the ALS or PD meta-analyses that are also significant in the meta-analyses of ALS + AD + PD

## Sheet: Table S4
Table S4 - Top-most associated mQTL SNPs for the top-most significantly associated MOMENT meta-analysis of AD, ALS and PD, DNAm sites and their corresponding p-values in a meta-analysis of of GWAS summary statistics of AD, ALS and PD. Blood and brain mQTL SNPs were associated with 4 and of the 12 DNAm probes, respectively. None of the mQTLs overlapped with significant SNPs from the meta-analysis …
SNP	Chr	BP	A1	A2	Freq	Probe	Probe_bp	Gene	Orientation	b.mQTL	se.mQTL	p.mQTL	p.META-GWAS	p.META-MOMENT
Blood mQTLS
rs2062800	9	132594362	T	C	0.251444	cg13953978	132600788	USP20	F	0.40807	0.0363317	2.84616e-29	0.02924	5.28e-08
rs9472155	6	43897727	T	C	0.24138	cg18120259	43894639	-	F	0.452558	0.0366802	5.65762e-35	0.4334	2.29e-07
rs56666949	2	56090472	T	C	0.109741	cg24166814	56067277	-	F	-0.366314	0.0527509	3.80547e-12	0.5161	5.6e-12
Brain mQTLS
rs9615936	22	46686328	C	G	0.8834	cg04431254	46684772	TTC38	F	0.453665	0.0706879	1.38211e-10	0.4724	1e-08
rs6811062	4	139143747	G	A	0.91411	cg06690548	139162808	SLC7A11	R	0.384433	0.0628713	9.68045e-10	0.851	1.36e-08
rs1776721	6	43890983	T	G	0.3006	cg18120259	43894639	-	F	0.321957	0.0446537	5.59128e-13	0.4596	2.29e-07
rs72807735	2	56066916	A	G	0.93149	cg24166814	56067277	-	F	0.552748	0.0694053	1.66491e-15	0.7989	5.6e-12

## Sheet: Table S5
Table S5 - Top eQTLs per gene, passing Bonferroni correction (from AMP-AD consortium), falling in the queried 1Mb window, centered at each of the 12 DMPs from MOMENT meta-analysis. Base pair annotation from hg19 build. DMPs_MOMENT - probe at which 1Mb region was centered.
DMP_MOMENT	CHR	BP	SNP	snpLocId	gene	geneSymbol	statistic	p	FDR	beta	A1	A2	A2freq	expressionIncreasingAllele	strand	geneBiotype	geneStartPosition	geneEndPosition
cg03546163	6	35981637	rs602932	6:35981637_C_T	ENSG00000112053	SLC26A8	-20.2299	5.34e-91	9.62e-88	-0.777942	C	T	0.23318	C	-1	protein_coding	35943514	36024868
cg03546163	6	36098130	rs12210946	6:36098130_G_A	ENSG00000156711	MAPK13	17.5972	2.59e-69	2.91e-66	0.674561	G	A	0.286418	A	1	protein_coding	36127809	36144524
cg03546163	6	35436925	rs2076172	6:35436925_C_T	ENSG00000198755	RPL10A	-14.1049	3.54e-45	1.68e-42	-0.494581	C	T	0.572011	C	1	protein_coding	35468408	35470785
cg03546163	6	35162141	rs11755266	6:35162141_C_T	ENSG00000196821	C6orf106	12.3731	3.66e-35	1.15e-32	0.767588	C	T	0.0898995	T	-1	protein_coding	34587288	34696859
cg03546163	6	35880128	rs9470171	6:35880128_C_T	ENSG00000096063	SRPK1	10.4165	2.08e-25	4.29e-23	0.394907	C	T	0.353034	T	-1	protein_coding	35832966	35921342
cg03546163	6	35772167	rs2766522	6:35772167_G_A	ENSG00000197753	LHFPL5	-9.1225	7.34e-20	1.09e-17	-0.348433	G	A	0.357024	G	1	protein_coding	35805293	35833874
cg03546163	6	35203745	rs4713843	6:35203745_T_C	ENSG00000146197	SCUBE3	-8.58475	9.1e-18	1.15e-15	-0.490428	T	C	0.897563	T	1	protein_coding	35214419	35253079
cg03546163	6	35334984	rs72911076	6:35334984_G_A	ENSG00000064995	TAF11	7.56201	3.97e-14	3.71e-12	0.676402	G	A	0.0470335	A	-1	protein_coding	34877778	34888089
cg03546163	6	35206553	rs732594	6:35206553_C_A	ENSG00000065060	UHRF1BP1	-7.48632	7.08e-14	6.48e-12	-0.292291	C	A	0.455621	C	1	protein_coding	34792015	34883138
cg03546163	6	35251317	rs12203818	6:35251317_G_A	ENSG00000064999	ANKS1A	7.25722	3.95e-13	3.39e-11	0.345536	G	A	0.211044	A	1	protein_coding	34889265	35091413
cg04431254	22	47158179	rs12389	22:47158179_G_A	ENSG00000260708		-31.105	2.06e-212	3.13e-208	-0.962376	G	A	0.349634	G	-1	antisense	46761894	46762563
cg04431254	22	46647909	rs3087501	22:46647909_A_G	ENSG00000130943	PKDREJ	-16.4437	9.31e-61	7.08e-58	-1.05786	A	G	0.143177	A	-1	protein_coding	46255663	46263355
cg04431254	22	46685017	rs6007794	22:46685017_G_A	ENSG00000075234	TTC38	14.5408	6.68e-48	3.36e-45	1.32964	G	A	0.0312879	A	1	protein_coding	46267961	46294008
cg04431254	22	46441980	rs7285579	22:46441980_C_T	ENSG00000231711	LINC00899	11.1509	7.09e-29	2.06e-26	0.435019	C	T	0.305833	T	-1	processed_transcript	46039907	46044853
cg04431254	22	46753461	rs9627422	22:46753461_T_G	ENSG00000075275	CELSR1	8.21044	2.2e-16	3.29e-14	0.786142	T	G	0.0310351	G	-1	protein_coding	46360834	46537170
cg06690548	4	139230820	rs4863780	4:139230820_C_A	ENSG00000251372	LINC00499	32.0396	3.06e-225	3.94e-220	1.38444	C	A	0.139908	A	1	lincRNA	138309711	138424344
cg06690548	4	139230820	rs4863780	4:139230820_C_A	ENSG00000151012	SLC7A11	-9.52811	1.6e-21	3.63e-19	-0.524233	C	A	0.139908	C	-1	protein_coding	138164097	138242349
cg11881599	12	93014048	rs112999651	12:93014048_C_T	ENSG00000102189	EEA1	6.26484	3.73e-10	3.88e-08	0.269621	C	T	0.26914	T	-1	protein_coding	92770637	92929331
cg13953978	9	133030867	rs10819629	9:133030867_C_G	ENSG00000148357	HMCN2	-10.3442	4.35e-23	1.27e-20	-0.622465	C	G	0.390593	C	1	protein_coding	130265882	130434123
cg13953978	9	132261028	rs34036994	9:132261028_C_T	ENSG00000204054	LINC00963	-9.68947	3.34e-22	9.27e-20	-0.438983	C	T	0.205571	C	1	processed_transcript	129483451	129513686
cg13953978	9	132588736	rs7034673	9:132588736_A_T	ENSG00000136827	TOR1A	-8.41137	4.05e-17	8.06e-15	-0.337503	A	T	0.260727	A	-1	protein_coding	129812944	129824134
cg13953978	9	132557455	rs74890065	9:132557455_C_T	ENSG00000136816	TOR1B	8.25764	1.49e-16	2.82e-14	0.695296	C	T	0.0524238	T	1	protein_coding	129803153	129811281
cg13953978	9	132653687	rs7853331	9:132653687_C_T	ENSG00000187239	FNBP1	-6.59549	4.24e-11	4.87e-09	-0.246662	C	T	0.439022	C	-1	protein_coding	129887187	130043194
cg14195992	8	48294770	rs1077262	8:48294770_C_A	ENSG00000104738	MCM4	-11.8386	2.47e-32	1.44e-29	-0.718793	C	A	0.0923146	C	1	protein_coding	47960185	47978160
cg14195992	8	48251764	rs4873269	8:48251764_T_C	ENSG00000164808	SPIDR	10.6067	2.78e-26	1.15e-23	0.430986	T	C	0.739756	C	1	protein_coding	47260575	47736306
cg17786255	4	108605212	rs12502059	4:108605212_G_A	ENSG00000138801	PAPSS1	-9.39886	5.52e-21	1.2e-18	-0.434471	G	A	0.193545	G	-1	protein_coding	107590276	107720452
cg17786255	4	108951058	rs6832702	4:108951058_G_C	ENSG00000138796	HADH	-7.35735	1.88e-13	2.32e-11	-0.483532	G	C	0.918008	G	1	protein_coding	107989714	108035175
cg17901584	1	55072726	rs1616691	1:55072726_T_C	ENSG00000184313	MROH7	14.2881	2.6e-46	2.26e-43	0.527698	T	C	0.611545	C	1	protein_coding	54641754	54710266
cg17901584	1	55046535	rs300267	1:55046535_C_T	ENSG00000162390	ACOT11	9.13791	6.37e-20	1.64e-17	0.345008	C	T	0.609271	T	1	protein_coding	54542257	54639192
cg17901584	1	55193714	rs6588529	1:55193714_G_C	ENSG00000243725	TTC4	7.93717	2.07e-15	3.8e-13	0.891437	G	C	0.0458995	C	1	protein_coding	54715822	54742657
cg17901584	1	55345865	rs72903545	1:55345865_G_A	ENSG00000116133	DHCR24	-6.91921	4.54e-12	6.12e-10	-0.415075	G	A	0.10607	G	-1	protein_coding	54849633	54887218
cg17901584	1	55090281	rs12407085	1:55090281_T_C	ENSG00000162391	FAM151A	6.56551	5.19e-11	6.32e-09	0.299587	T	C	0.345038	C	-1	protein_coding	54609182	54623556
cg18120259	6	44274451	rs161706	6:44274451_G_A	ENSG00000124608	AARS2	8.7303	2.54e-18	3.38e-16	0.806736	G	A	0.963983	A	-1	protein_coding	44299654	44313326
cg18120259	6	44098672	rs55862642	6:44098672_T_G	ENSG00000180992	MRPL14	-7.57831	3.5e-14	3.29e-12	-0.392968	T	G	0.131057	T	-1	protein_coding	44113454	44127457
cg18120259	6	44279111	rs9688508	6:44279111_A_G	ENSG00000146221	TCTE1	7.55726	4.12e-14	3.84e-12	0.323805	A	G	0.238874	G	-1	protein_coding	44278743	44297688
cg18120259	6	44117607	rs4714761	6:44117607_C_T	ENSG00000137216	TMEM63B	6.35822	2.04e-10	1.34e-08	0.449392	C	T	0.0782202	T	1	protein_coding	44126914	44155519
cg24166814	2	56128091	rs7596872	2:56128091_C_A	ENSG00000115380	EFEMP1	12.1221	8.07e-34	3.84e-31	0.741177	C	A	0.10303	A	-1	protein_coding	55865967	55924139
cg24166814	2	55834597	rs6545509	2:55834597_A_G	ENSG00000138035	PNPT1	-6.64897	2.95e-11	3.06e-09	-0.557373	A	G	0.0533762	A	-1	protein_coding	55634265	55693910
cg26033520	10	73758332	rs730334	10:73758332_C_T	ENSG00000122863	CHST3	-13.3008	2.29e-40	1.25e-37	-0.469046	C	T	0.597387	C	1	protein_coding	71964365	72013564
cg26033520	10	74362355	rs3009540	10:74362355_T_C	ENSG00000107745	MICU1	10.2098	1.79e-24	5.35e-22	0.407348	T	C	0.706605	C	-1	protein_coding	72367327	72626191
cg26033520	10	74025656	rs17712800	10:74025656_G_C	ENSG00000138303	ASCC1	6.56228	5.3e-11	5.11e-09	0.625471	G	C	0.0455362	C	-1	protein_coding	72096032	72217134
cg26272088	15	99791339	rs56315393	15:99791339_A_C	ENSG00000103852	TTC23	-19.8888	5.09e-88	1.17e-84	-0.67012	A	C	0.476665	A	-1	protein_coding	99136323	99251223
cg26272088	15	99670265	rs3743244	15:99670265_C_T	ENSG00000182253	SYNM	-10.5833	3.56e-26	1.13e-23	-0.521557	C	T	0.161501	C	1	protein_coding	99098217	99135593

## Sheet: Table S6
Tale S7 - Results of logistic regression models used to estimate effect sizes of cell-type proportion for each cohort.
Cohort	term	estimate (log odds)	s.e.	statistic	p.value	estimate (OR)	N
AIBL							603
	(Intercept)	-8.49913	2.51665	-3.37715	0.000732401
	B	-0.139526	0.0701496	-1.98897	0.0467041	0.869771
	NK	0.0136095	0.045348	0.300112	0.764091	1.0137
	CD4T	-0.00639481	0.0250137	-0.255652	0.798219	0.993626
	Mono	-0.104098	0.058484	-1.77995	0.0750846	0.901137
	Gran	0.00774455	0.0245312	0.315702	0.752228	1.00777
	Sex (M)	-0.062594	0.245953	-0.254496	0.799113	0.939325
	Predicted age	0.105459	0.0172513	6.1131	9.77147e-10	1.11122
	Smoking score	0.114029	0.190666	0.598058	0.549801	1.12079
AUS							1316
	(Intercept)	-1.57318	1.46482	-1.07397	0.282835	0.207385
	B	-0.0463329	0.0354966	-1.30527	0.191799	0.954724
	NK	-0.0315727	0.0249654	-1.26466	0.205995	0.968921
	CD4T	-0.01445	0.0174462	-0.82826	0.407523	0.985654
	Mono	-0.0332936	0.0288346	-1.15464	0.248237	0.967255
	Gran	0.0295259	0.0149418	1.97606	0.0481485	1.02997
	Sex (M)	0.721186	0.144879	4.97785	6.42948e-07	2.05687
	Predicted age	0.00454509	0.00527146	0.862207	0.388574	1.00456
	Smoking score	-0.0787673	0.0755242	-1.04294	0.296975	0.924255
SGPD							1474
	(Intercept)	-1.18329	1.39481	-0.848357	0.396239
	B	-0.163024	0.0357886	-4.55518	5.23396e-06	0.849571
	NK	0.0750835	0.0246846	3.04172	0.00235232	1.07797
	CD4T	0.00820179	0.0151507	0.541348	0.588268	1.00824
	Mono	-0.0385439	0.0285203	-1.35145	0.176551	0.96219
	Gran	0.0416298	0.01427	2.91729	0.00353083	1.04251
	Sex (M)	0.337544	0.1387	2.43364	0.014948	1.4015
	Predicted age	0.000563972	0.00696856	0.0809309	0.935497	1.00056
	Smoking score	-0.486759	0.100164	-4.85963	1.17606e-06	0.614615
SCZ1							659
	(Intercept)	-16.4469	3.49023	-4.71227	2.44974e-06
	B	0.161673	0.0830959	1.94562	0.0516999	1.17548
	NK	-0.0341773	0.0516277	-0.661994	0.507975	0.9664
	CD4T	0.0607276	0.0395101	1.53701	0.12429	1.06261
	Mono	0.141546	0.0695124	2.03626	0.0417238	1.15205
	Gran	0.111335	0.0354208	3.14321	0.00167106	1.11777
	Sex (M)	1.16513	0.29082	4.00636	6.16622e-05	3.20634
	Predicted age	0.0208999	0.00730337	2.86168	0.00421404	1.02112
	Smoking score	1.14166	0.100103	11.4048	3.95597e-30	3.13197
RA							649
	(Intercept)	-9.15873	2.25316	-4.06483	4.80678e-05
	B	0.128822	0.0649106	1.9846	0.0471886	1.13749
	NK	-0.0819079	0.043222	-1.89505	0.0580856	0.921357
	CD4T	-0.0371266	0.0304284	-1.22013	0.222416	0.963554
	Mono	0.176324	0.0565561	3.11768	0.0018228	1.19282
	Gran	0.116595	0.023102	5.04698	4.48852e-07	1.12366
	Sex (M)	0.392685	0.252677	1.5541	0.120161	1.48095
	Predicted age	-0.00587065	0.00840886	-0.698151	0.485083	0.994147
	Smoking score	0.0728556	0.0889182	0.819355	0.412584	1.07558

## Sheet: Table S7
Table S7- Characteristic scores (-log10 of Leven's test p-value) reflecting variation in each cell type, for each CpG. A characteristic score is considered significant in that cell-type if it is smaller than 9x10-8.
Probe	Characteristic Scores					whichBest	Meta-analysis
	B.cells	CD4.T.cells	CD8.T.cells	Granulocytes	Monocytes		bp	Gene	Orien	bMETA	s.eMETA.	pMETA
cg03546163	0.561062	-2.52339	1.71828	-0.374465	0.030283		35686586	FKBP5	R	-0.43	0.06	3.42x10-12
cg26272088	0.117502	-0.740864	1.44047	0.0716424	-0.823328		98900110	IGF1R	F	1.39	0.2	5.74x10-12
cg24166814	0.432886	-2.5783	0.527952	0.73023	-0.145358		55840142	-	F	-0.83	0.13	5.60x10-11
cg04431254	0.321269	-0.822026	7.58745	-2.62549	-1.2532	CD8T cells	46288875	TTC38	F	-1.44	0.25	1x0-8
cg06690548	-0.293517	-1.30691	0.919947	0.40861	-0.0668306		138241654	SLC7A11	R	0.52	0.09	1.36x10-8
cg14195992	0.63689	-0.20565	-0.00390385	-0.602222	-0.0539739		47353350	SPIDR	R	-0.85	0.15	1.48x10-8
cg17786255	0.53023	-1.19047	-0.954908	1.39462	0.0413329		107893233	RP11-286E11.1; SGMS2	R	-0.62	0.11	3.45x10-8
cg11881599	8.31526	-2.89262	-1.40864	-0.238446	0.0857306	B cells	92420308	RP11-693J15.4; CLLU1OS;CLLU1	R	0.85	0.15	3.57x10-8
cg13953978	-1.36601	-0.323166	6.56527	-0.972349	-1.94958		129838509	USP20	F	0.99	0.18	5.28x10-8
cg17901584	1.21669	-0.977025	-0.369132	-0.0882336	0.0222117		54888033	RP11-67L3.4; DHCR24	F	0.48	0.09	1.39x10-7
cg18120259	-0.729183	-0.992257	-0.182088	0.874609	0.911796		43926902	-	F	0.67	0.13	2.29x10-7
cg26033520	-1.10511	-0.02044	5.78677	-1.25092	-0.627056		72244313	-	F	-0.58	0.11	2.74x10-7
													=
